# Supplementary material for: Line-Field Confocal Optical Coherence Tomography: A New Tool for the Differentiation between Nevi and Melanomas?
Source: MDPI journal article supplement (doi:10.3390/cancers14051140), 2022-02-23
Supplement: s1 [file s1]

**Table S1.** Most common LC-OCT parameters for melanocytic lesions.

| N=77                                                                 | Non-dysplastic nevus<br>(N=39) | Dysplastic nevus<br>(N=12) | All nevus<br>(N=51) | Melanoma<br>(N=26) |
|----------------------------------------------------------------------|--------------------------------|----------------------------|---------------------|--------------------|
| <b>LC-OCT horizontal parameters</b>                                  |                                |                            |                     |                    |
| Regular honeycombed pattern                                          | 33 (85)                        | 8 (67)                     | 41 (80)             | 2 (8)              |
| Irregular honeycombed pattern                                        | 6 (15)                         | 5 (42)                     | 11 (22)             | 24 (92)            |
| Pagetoid spread with atypical melanocytes in basal suprabasal layers | 4 (10)                         | 4 (33)                     | 8 (16)              | 23 (89)            |
| Edged papillae                                                       | 24 (62)                        | 12 (100)                   | 36 (71)             | 9 (35)             |
| Non-edged papillae                                                   | 15 (39)                        | 7 (58)                     | 22 (43)             | 16 (62)            |
| Basal hyperpigmentation                                              | 25 (64)                        | 11 (62)                    | 36 (71)             | 14 (54)            |
| Basal nests                                                          | 20 (51)                        | 9 (75)                     | 29 (57)             | 6 (23)             |
| Nests in the upper dermis                                            | 20 (51)                        | 7 (58)                     | 27 (53)             | 5 (19)             |
| Irregular bright cells in the upper dermis                           | 4 (10)                         | 1 (8)                      | 5 (10)              | 10 (39)            |
| <b>LC-OCT vertical parameters</b>                                    |                                |                            |                     |                    |
| Pagetoid spread of bright cells in suprabasal/basal layers           | 4 (10)                         | 2 (17)                     | 6 (12)              | 19 (73)            |
| Basal hyperpigmentation                                              | 24 (62)                        | 11 (92)                    | 35 (69)             | 14 (54)            |
| Junctional nests                                                     | 22 (56)                        | 10 (83)                    | 32 (63)             | 9 (35)             |
| Well-defined DEJ                                                     | 28 (72)                        | 10 (83)                    | 38 (75)             | 10 (39)            |
| Disturbed DEJ                                                        | 10 (26)                        | 2 (17)                     | 12 (24)             | 20 (77)            |
| Reticular acanthosis                                                 | 16 (41)                        | 6 (50)                     | 22 (43)             | 6 (23)             |
| Atrophy                                                              | 9 (23)                         | 1 (8)                      | 10 (20)             | 4 (15)             |
| Dermal nests                                                         | 25 (64)                        | 5 (42)                     | 30 (59)             | 6 (23)             |
| Sheets of atypical bright cells                                      | 1 (3)                          | 0 (0)                      | 1 (2)               | 9 (35)             |

**Table S2.** LC-OCT key criteria more useful in discriminating a melanoma from a nevus (dysplastic or not).

| Parameters                                                           | OR (univariate)      | P value |
|----------------------------------------------------------------------|----------------------|---------|
| <b>Horizontal parameters</b>                                         |                      |         |
| Regular honeycombed pattern                                          | 0.02 (0.00-0.08)     | <0.001  |
| Irregular honeycombed pattern                                        | 43.64 (10.80-299.67) | <0.001  |
| Pagetoid spread with atypical melanocytes in basal suprabasal layers | 41.21 (11.28-206.45) | <0.001  |
| Edged papillae                                                       | 0.22 (0.08-0.59)     | 0.003   |
| Non-edged papillae                                                   | 2.11 (0.81-5.68)     | 0.13    |
| Basal hyperpigmentation (bright keratinocytes/basal layer)           | 0.49 (0.18-1.30)     | 0.15    |
| Basal nests                                                          | 0.23 (0.07-0.63)     | 0.007   |
| Nests in the upper dermis                                            | 0.21 (0.06-0.61)     | 0.007   |
| Irregular bright cells/sheets of cells in the upper dermis           | 5.75 (1.77-20.94)    | 0.005   |
| <b>Vertical parameters</b>                                           |                      |         |
| Pagetoid spread of bright cells in suprabasal/basal layers           | 20.36 (6.44-74.84)   | <0.001  |
| Basal hyperpigmentation                                              | 0.53 (0.20-1.41)     | 0.21    |
| Junctional nests                                                     | 0.31 (0.11-0.83)     | 0.02    |
| Well-defined DEJ                                                     | 0.21 (0.08-0.58)     | 0.003   |
| Disturbed DEJ                                                        | 10.83 (3.73-35.72)   | <0.001  |
| Reticular acanthosis                                                 | 0.40 (0.13-1.10)     | 0.09    |
| Atrophy                                                              | 0.75 (0.19-2.52)     | 0.65    |
| Dermal nests                                                         | 0.21 (0.07-0.58)     | 0.004   |
| Sheets of atypical bright cells                                      | 26.47 (4.50-506.78)  | 0.003   |

**Table S3.** Most common RCM parameters for melanocytic lesions.

| N=34                                                                 | Non-dysplastic nevus<br>(N=13) | Dysplastic nevus<br>(N=7) | All nevus<br>(N=20) | Melanoma<br>(N=14) |
|----------------------------------------------------------------------|--------------------------------|---------------------------|---------------------|--------------------|
| <b>RCM parameters</b>                                                |                                |                           |                     |                    |
| Regular honeycombed pattern                                          | 13 (100)                       | 6 (86)                    | 19 (95)             | 2 (14)             |
| Irregular honeycombed pattern                                        | 0 (0)                          | 1 (14)                    | 1 (5)               | 11 (79)            |
| Pagetoid spread with atypical melanocytes in basal suprabasal layers | 1 (8)                          | 2 (29)                    | 3 (15)              | 12 (86)            |
| Edged papillae                                                       | 11 (85)                        | 7 (100)                   | 18 (90)             | 6 (43)             |
| Non-edged papillae                                                   | 1 (8)                          | 3 (43)                    | 4 (20)              | 10 (71)            |
| Basal hyperpigmentation                                              | 10 (77)                        | 7 (100)                   | 17 (85)             | 10 (71)            |
| Basal nests                                                          | 9 (69)                         | 5 (71)                    | 14 (70)             | 6 (43)             |
| Nests in the upper dermis                                            | 7 (54)                         | 3 (43)                    | 10 (50)             | 3 (21)             |
| Irregular bright cells in the upper dermis                           | 0 (0)                          | 0 (0)                     | 0 (0)               | 7 (50)             |

**Table S4.** RCM key criteria more useful in discriminating a melanoma from a nevus (dysplastic or not).

| Parameters                                                     | OR (univariate)     | P value |
|----------------------------------------------------------------|---------------------|---------|
| Regular honeycombed pattern                                    | 0.01 (0.00-0.07)    | <0.001  |
| Irregular honeycombed pattern                                  | 69.67 (9.13-1553.6) | <0.001  |
| Pagetoid spread with atypical melanocytes in suprabasal layers | 34.00 (5.91-315.56) | <0.001  |
| Edged papillae                                                 | 0.08 (0.01-0.44)    | 0.007   |
| Non-edged papillae                                             | 10.00 (2.21-56.29)  | 0.005   |
| Basal hyperpigmentation (bright keratinocytes/basal layer)     | 0.44 (0.07-2.39)    | 0.34    |
| Basal nests                                                    | 0.32 (0.07-1.30)    | 0.12    |
| Nests in the upper dermis                                      | 0.27 (0.05-1.19)    | 0.10    |
| Irregular bright cells/sheets of cells in the upper dermis     | 330425122 (0- NA)   | 0.99    |

**Table S5.** Analysis of the false negative cases.

| Patient | Irregular honey-combed pattern<br>(horizontal) | Pagetoid spread with<br>atypical melanocytes in<br>basal suprabasal layers<br>(horizontal) | Dermal nests | Disturbed DEJ<br>(vertical) | Comments                                                                            |
|---------|------------------------------------------------|--------------------------------------------------------------------------------------------|--------------|-----------------------------|-------------------------------------------------------------------------------------|
| MUC0222 | 1                                              | 0                                                                                          | 0            | 0                           | Histo: in situ SSMM + dysplastic nevus<br>LC-OCT quality = 1; LC-OCT confidence = 2 |
| MUC0300 | 0                                              | 0                                                                                          | 0            | 1                           | Histo: in situ SSMM<br>LC-OCT quality = 3; LC-OCT confidence = 3                    |
